# Supplementary material for: Cytotoxicity screening of Thymus vulgaris L. essential oil in brine shrimp nauplii and cancer cell lines
Source: PubMed Central journal article supplement (PMC8222331; doi:10.1038/s41598-021-92679-x), 2021-06-23
Supplement: 41598_2021_92679_MOESM1_ESM.pdf [file 41598_2021_92679_MOESM1_ESM.pdf]

**Cytotoxicity Screening of *Thymus vulgaris* L. Essential Oil in Brine Shrimp Nauplii and Cancer Cell Lines**

**Haris Nikšić, Fahir Bečić, Emina Korić, Irma Gušić, Elma Omeragić, Samija Muratović, Bojana Miladinović and Kemal Durić**

**Supplementary Figures:**

**Supplementary Figure S1.** Gas chromatography/mass spectroscopy spectrum of *Thymus vulgaris* L. essential oil native from Bosnia and Herzegovina

RT: 1.83 - 32.13

NL:  
2.33E9  
TIC MS  
Timijan HN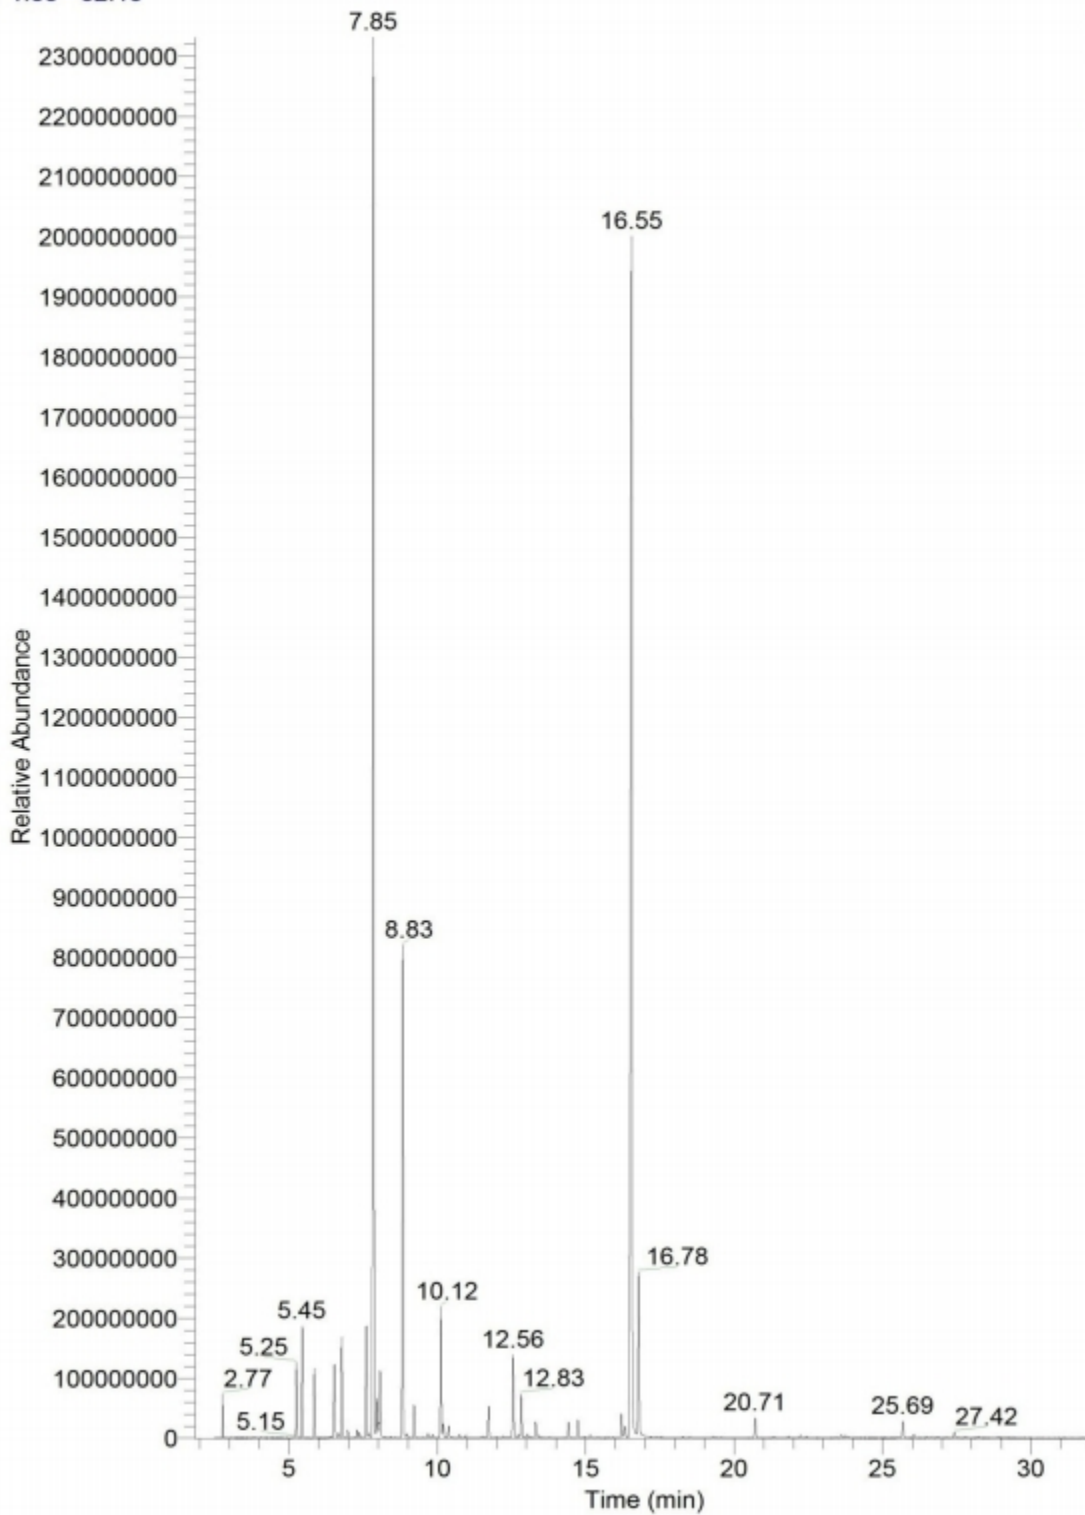

**Supplementary Figure S1.** Gas chromatography/mass spectroscopy spectrum of *Thymus vulgaris* L. essential oil native from Bosnia and Herzegovina
